# Supplementary material for: Energy transfer cooperation between ligands and EuIII ions in molecular europium complexes for vapoluminescence sensing (reversible on/off emission switching) and hybrid white LED/plant-growth applications
Source: Royal Society of Chemistry journal article supplement (doi:10.1039/d1tc02363b), 2021-01-01
Supplement: d1tc02363b1.pdf [file d1tc02363b1.pdf]

**Cooperation in energy transfer between ligands and Eu<sup>III</sup> ion in molecular europium complexes for vapoluminescence sensor (reversible on/off emission switching) and hybrid white LEDs/Plant-growth applications.**

Marikumar Rajendran, Rachna Devi, Sibani Mund, Kasturi Singh and Sivakumar Vaidyanathan\*

Department of Chemistry, National Institute of Technology Rourkela, India.

**EXPERIMENTAL STUDIES:**

All the reagents were used as purchased without any further purification. All the operations involving air-sensitive reagents were performed under dry nitrogen atmosphere. The procedure for the synthesis of Phen-fl-mCF<sub>3</sub> were adopted from the literature and modified accordingly.

**General information for Measurements:**

<sup>1</sup>H and <sup>13</sup>C-NMR spectra were measured on a BRUKER AV 400 Avance- III (400 MHz) instrument with tetramethyl silane as the internal standard. The absorption spectra of the synthesized luminophores were measured using a SHIMADZU UV-2450 spectrophotometer. The photoluminescence (excitation and emission) spectra, lifetime and quantum yield, were recorded by using Edinburg Spectrofluorometer FS-5 instruments with attaching SC – 10 modules and SC – 30 integrating sphere module. A pulsed xenon lamp was used as the excitation source, and the signals were detected with a photomultiplier. Cyclic voltammetry experiments were performed in dimethyl formamide solution containing 0.1 M tert-butyl ammonium perchlorate using Ag/AgCl as the reference electrode at a scan rate of 100 mV s<sup>-1</sup> using an AUTOLAB 302NModular potentiostat. The CIE colour chromaticity coordinates of the phosphor were calculated from the emission spectral values by using MATLAB software.

## Computational details

The molecules under study were optimized in the gas phase using density functional theory and the Becke three parameter Lee–Yang–Parr (B3LYP) form for the exchange– correlation potential and the 6-31G (d, p) basis set. All the structures were found to be in the minima of the potential energy surface as the normal mode of frequencies were all positive. Theory (TD-DFT) with gas phase optimized geometries. It is expected that the geometry of the molecule will change in the solvent phase in comparison to that of the gas phase, has been carried out. We found that there is no prominent change in the geometries of the molecules. As the UV-Vis experiment was done in the solution phase. Singlet and triplet energy calculations were performed by using the TD-SCF and B3LYP/6-31G (P) approach. All the calculations were carried out using the Gaussian09 and Gaussian View suite of programs. The optoelectronic properties including FMOs, absorption and emission spectra were calculated using TD-DFT analysis. [18-20]

## General synthesis procedure of fluorophores:

**Phen-fl-mCF<sub>3</sub>:** 1,10-phenanthroline-5,6-dione (phen-dione) (1.0 g, 4.762 mmol) solution in acetic acid is poured in two neck round bottom flask and vigorously stirred for 15 min. after obtained the clear solution we added Fluorene-NH<sub>2</sub> (0.619 g, 5.238 mmol) and 3-(trifluoromethyl)benzaldehyde (0.910 g, 5.238 mmol) followed by ammonium acetate. The whole reaction mixture is stirred overnight at 110°C under inert condition. The progress of the reaction is monitored by TLC (MeOH:DCM=1 : 9) at a regular interval of time. After completion of reaction the reaction mass is neutralized with ammonium hydroxide solution and extracted with DCM followed by drying with sodium sulphate. It was concentrated by Rota evaporator and purification is done by column chromatography using silica bed (100–

200 mesh) with 5% MeOH in DCM as the eluent. The powder form of product is obtained by dissolving it in THF and excess amount of hexane. After getting the solid product in the bottom of round bottom flask the solution mixture is decant slowly. Then ligand is confirmed by  $^1\text{H}$  and  $^{13}\text{C}$  NMR as shown below in Fig.S1-S4.  **$^1\text{H}$  NMR Data (400MHz,  $\text{CDCl}_3$ ,  $\delta\text{ppm}$ ):**  $\delta$  9.23 (dd,1H), 9.19 (dd,1H), 9.103 (dd,1H), 8.05(s,1H), 7.96(dd,1H), 7.88-7.79(m,4H), 7.59(m, 2H), 7.61-7.41(m,7H), 7.39-7.24(m,1H), 2.12-2.00 (m,4H), 0.460 (t,3H), 0.294 (t,3H).  **$^{13}\text{C}$  NMR Data (400MHz,  $\text{CDCl}_3$ ,  $\delta\text{ppm}$ ):** 152.88, 150.41, 150.26, 149.25, 148.28, 145.15, 144.54, 144.06, 139.70, 136.22, 135.96, 132.17, 131.17, 130.84, 130.56, 128.86, 128.61, 128.20, 127.46, 127.34, 127.27, 126.22, 126.19, 125.89, 125.85, 123.97, 123.68, 123.16, 123.11, 122.06, 121.53, 120.56, 119.84, 32.86, 32.58, 8.47, 8.16. Elemental Analysis: Anal. Calc. for.  $\text{C}_{37}\text{H}_{27}\text{F}_3\text{N}_4$ ; C, 76.01; H, 4.65; N, 9.58 %, Found: C, 75.89; H, 4.57; N, 9.66%.

**Phen-fl-p $\text{CH}_3$ :** Same procedure is followed as above for synthesis of Phen-fl-m $\text{CF}_3$ ; 1,10-phenanthroline-5,6-dione (phen-dione) (1.0 g, 4.762 mmol), Fluorene- $\text{NH}_2$  (0.619 g, 5.238 mmol) and 4-methylbenzaldehyde (0.629 g, 5.238 mmol).  **$^1\text{H}$  NMR Data: (400MHz,  $\text{CDCl}_3$ ,  $\delta\text{ppm}$ ):**  $\delta$  9.21 (d,1H), 9.19 (d, J=,1H), 9.05 (d,1H), 7.93 (d,1H), 7.85(s,1H), 7.85-7.77(m,1H), 7.65 (d, 1H) 7.56-7.43(m, 7H) 7.28-7.22(m,1H) 7.09(d, 2H).  **$^{13}\text{C}$  NMR Data (400MHz,  $\text{CDCl}_3$ ,  $\delta\text{ppm}$ ):** 152.48, 152.37, 150.19, 148.93, 147.90, 144.83, 143.59, 139.95, 139.43, 136.55, 130.59, 129.20, 129.05, 128.43, 128.13, 127.37, 127.02, 126.88, 128.05, 123.53, 123.42, 123.11, 121.96, 121.34, 120.43, 119.95, 32.98, 32.70, 30.97, 21.30, 8.48, 8.16. Elemental Analysis: Anal. Calc. for.  $\text{C}_{37}\text{H}_{30}\text{N}_4$ ; C, 83.74; H, 5.70; N, 10.56 %, Found: C, 83.72; H, 5.61; 10.71%.

**Eu(DBM)<sub>3</sub>-phen-fl-mCF<sub>3</sub>**; The solution of Eu(DBM)<sub>3</sub>(H<sub>2</sub>O)<sub>2</sub> (403 mg, 0.175mmol) in dry THF (15 mL) was taken in round bottom flask and stirrer constantly unless a clear solution obtain, after 20 minutes a mixture of phen-fl-mCF<sub>3</sub> (0.90 mg, 0.174) in dry THF was added slowly drop by drop. The reaction mixture was then stirred for 6 hours at 60°C in inert condition. The completion of the reaction is monitored by TLC then the mixture was concentrated and then dissolved in the minimum amount of THF. To this solution, excess hexane was added by the wall of the round bottom flask; the precipitate was obtained. The reaction mixture was filter and washed several time to achieve the final complex in powder (pale yellow color solid with 112 mg (~73.8%)) form. Elemental Analysis: Anal. Calc. for. C<sub>83</sub>H<sub>64</sub>EuF<sub>3</sub>N<sub>4</sub>O<sub>6</sub>; C, 70.09; H, 4.54; N, 3.94 %, Found: C, 70.02; H, 4.47; N, 3.99%.

**Eu(DBM)<sub>3</sub>-phen-fl-pCH<sub>3</sub>**; The complex was synthesized by previously described procedure using phen-fl-pCH<sub>3</sub> as the ligand instead of phen-fl-mCF<sub>3</sub>. Elemental Analysis: Anal. Calc. for. C<sub>82</sub>H<sub>63</sub>EuN<sub>4</sub>O<sub>6</sub>; C, 72.83; H, 4.70; N, 4.14 %, Found: C, 72.75; H, 4.63; N, 4.20%.

**Eu(TTA)<sub>3</sub>-phen-fl-mCF<sub>3</sub>**; Taken a 25 mL two neck round bottom flask with nitrogen balloon with adaptor and poured Eu(TTA)<sub>3</sub>.2H<sub>2</sub>O (0.152 g, 0.178 mmol, 2 eq) dissolved in dry tetrahydrofuran (THF) (10 mL). The mixture of phen-fl-mCF<sub>3</sub> (0.100 g, 0.089 mmol, 1eq) in THF (5 mL) was added to the reaction mixture (RM) then stirred for 6 h at 60 °C. The resulting product was concentrated and dissolved in a minimum amount of THF. Then added the excess of hexane to get the solid product which is pale yellow, yield 0.112 g (70.2%). Elemental Analysis: Anal. Calc. for. C<sub>63</sub>H<sub>45</sub>EuF<sub>12</sub>N<sub>4</sub>O<sub>6</sub>S<sub>3</sub>; C, 52.87; H, 3.24; N, 3.91; S, 6.72 %, Found: C, 52.81; H, 3.19; N, 3.99; S, 6.76%.

**Eu(TTA)<sub>3</sub>-phen-fl-pCH<sub>3</sub>:** The complex was synthesized by previously described procedure using phen-fl-pCH<sub>3</sub> as the ligand instead of phen-fl-mCF<sub>3</sub>. Elemental Analysis: Anal. Calc. for. C<sub>63</sub>H<sub>49</sub>EuN<sub>4</sub>O<sub>6</sub>S<sub>3</sub>; C, 54.94; H, 3.59; N, 4.07; S, 6.98 %, Found: C, 54.87; H, 3.51; N, 4.13; S, 6.95%.

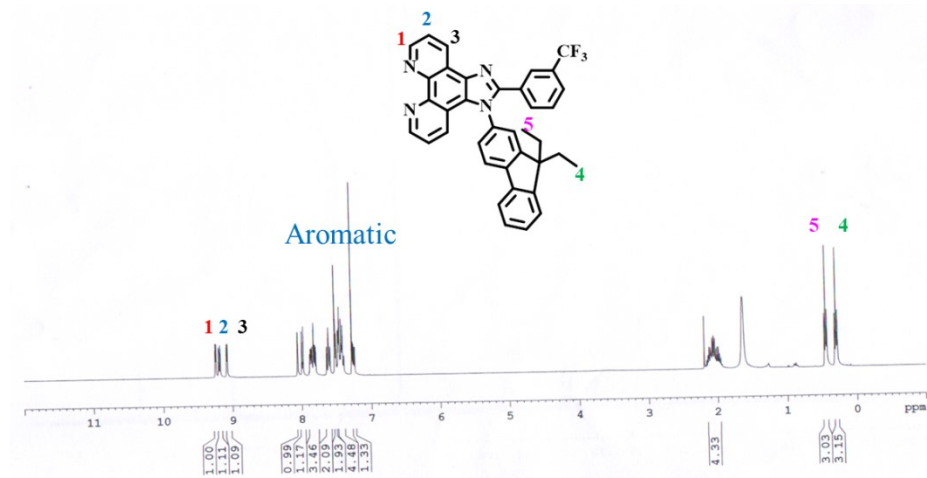

**Fig. S1.** <sup>1</sup>H NMR spectroscopy of Phen-fl-m-CF<sub>3</sub> in CDCl<sub>3</sub>

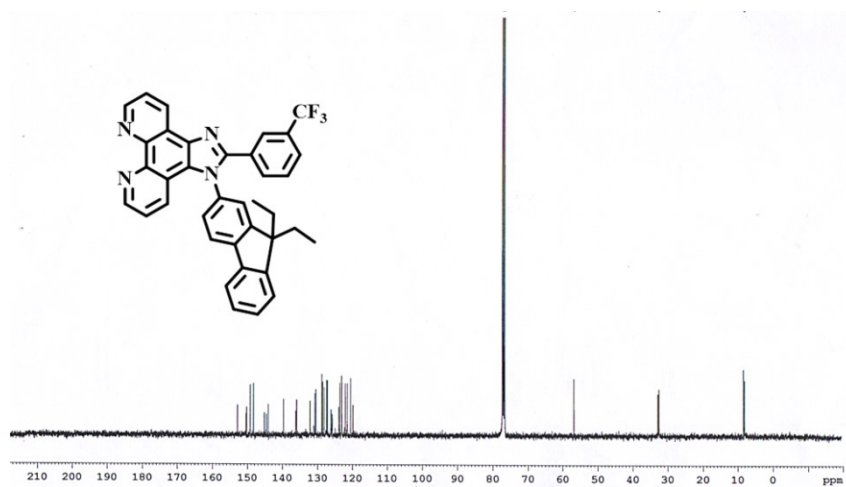

**Fig. S2.** <sup>13</sup>C NMR spectroscopy of Phen-fl-m-CF<sub>3</sub> in CDCl<sub>3</sub>

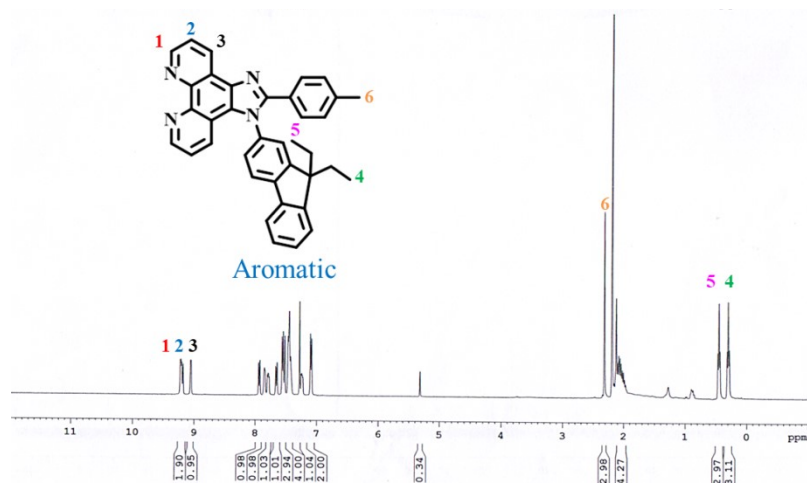

**Fig. S3.** <sup>1</sup>H NMR spectroscopy of Phen-fl-p-CH<sub>3</sub> in CDCl<sub>3</sub>

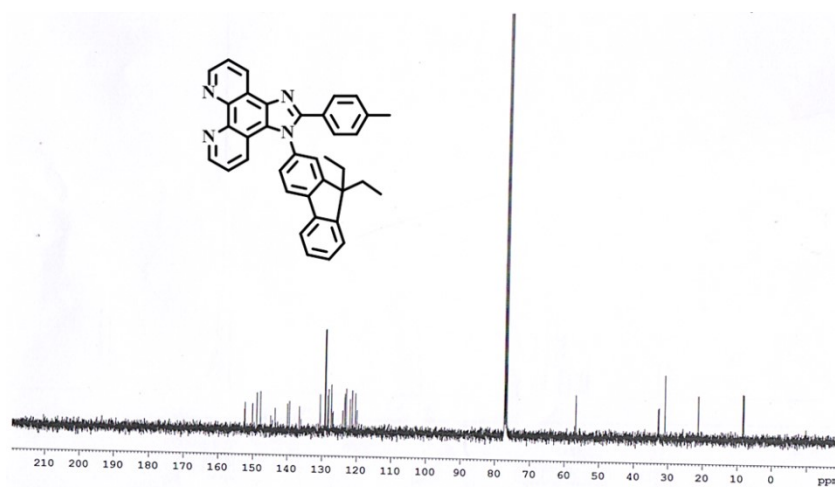

**Fig. S4.** <sup>13</sup>C NMR spectroscopy of Phen-fl-p-CH<sub>3</sub> in CDCl<sub>3</sub>

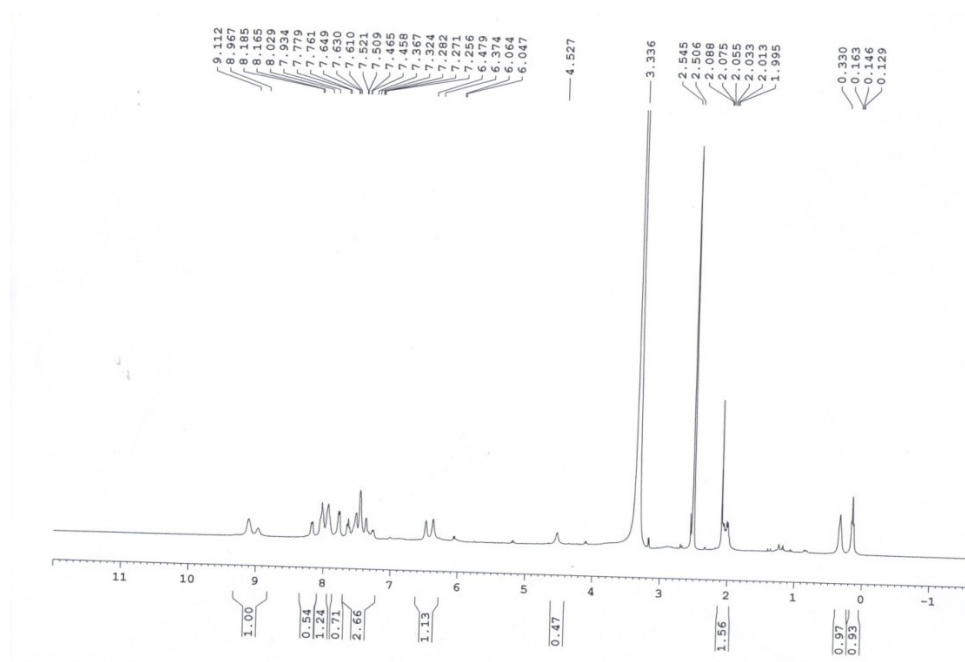

### **$^1\text{H}$ NMR of the Complex:**

**Fig. S4.(a)**  $^1\text{H}$  NMR spectroscopy of  $\text{Eu}(\text{TTA})_3\text{Phen-fl-m-CF}_3$  in  $\text{DMSO-d}_6$

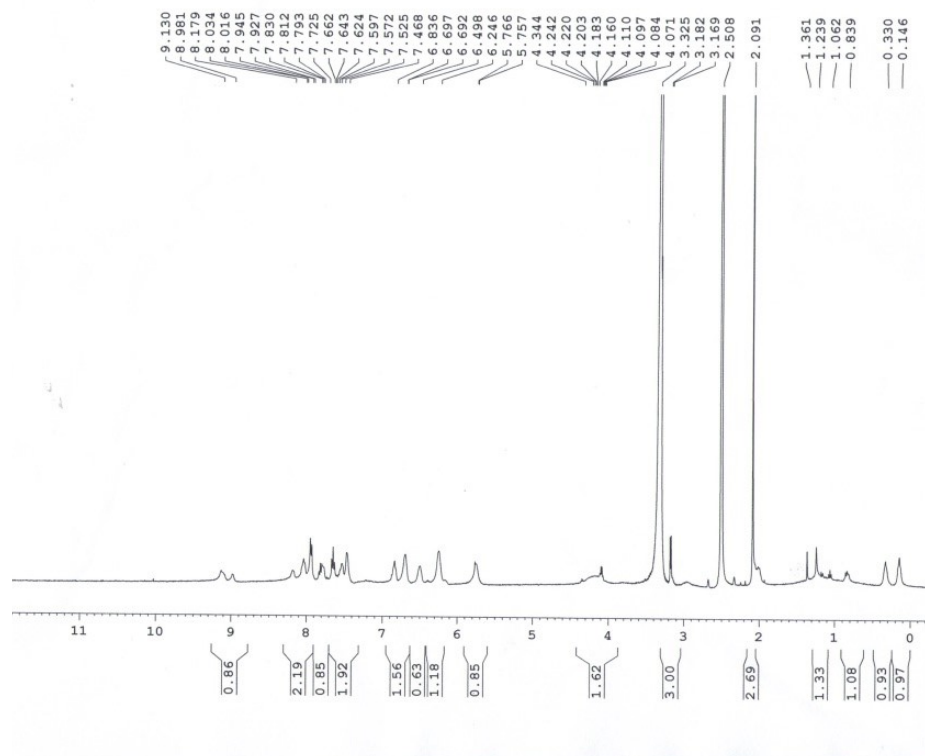

**Fig. S4.(b)**  $^1\text{H}$  NMR spectroscopy of  $\text{Eu}(\text{DBM})_3\text{Phen-fl-m-CF}_3$  in  $\text{DMSO-d}_6$

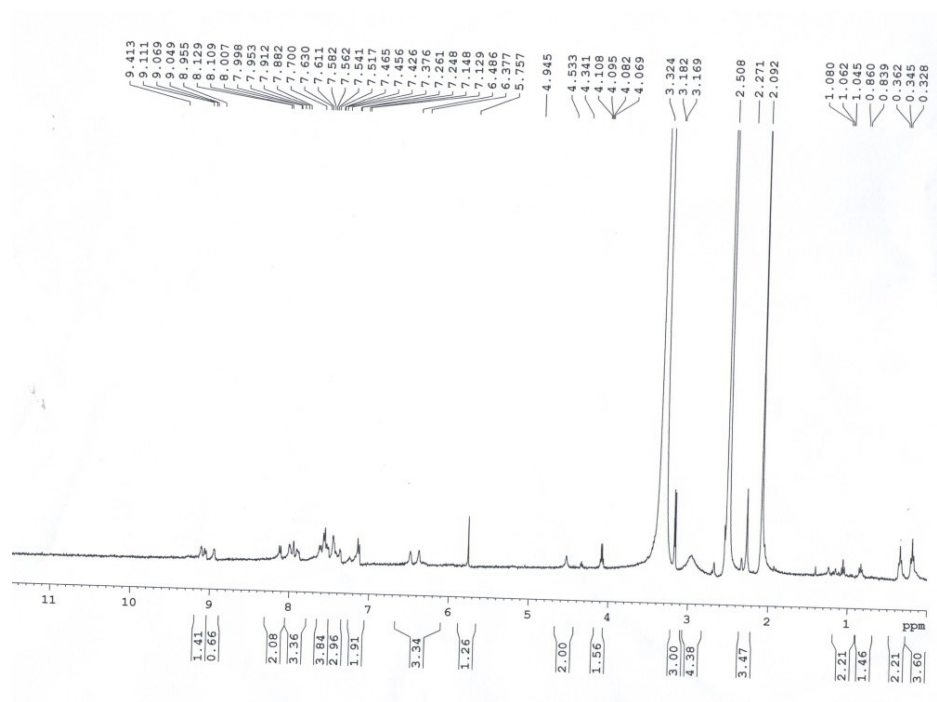

**Fig. S4. (c)**  $^1\text{H}$  NMR spectroscopy of  $\text{Eu}(\text{TTA})_3\text{Phen-fl-p-CH}_3$  in  $\text{DMSO-d}_6$

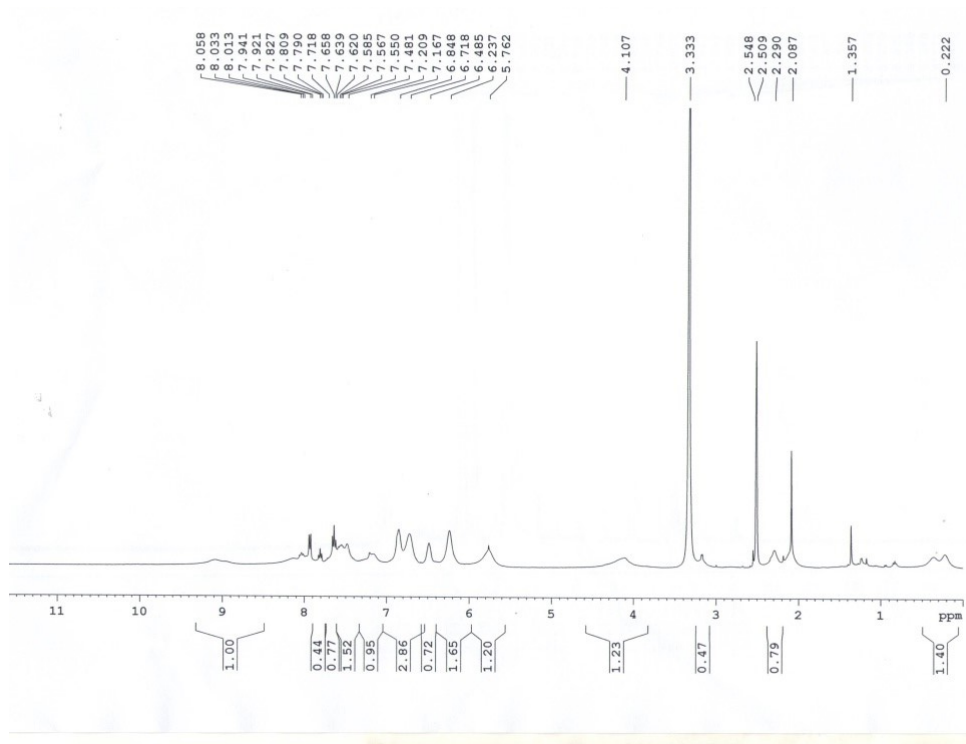

**Fig. S4. (d)**  $^1\text{H}$  NMR spectroscopy of  $\text{Eu}(\text{DBM})_3\text{Phen-fl-p-CH}_3$  in  $\text{DMSO-d}_6$

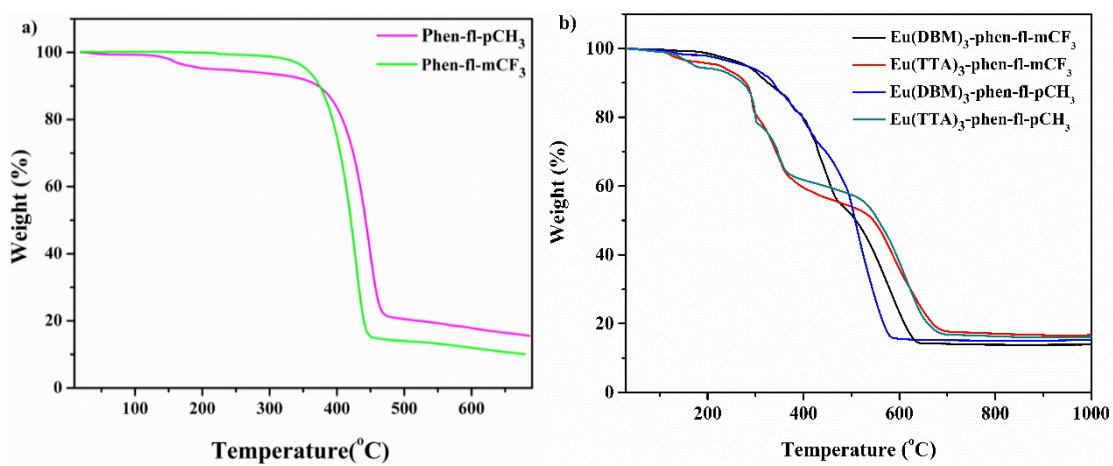

**Fig. S5.** TGA of ligand (a) and  $\text{Eu}(\text{III})$  complexes (b).

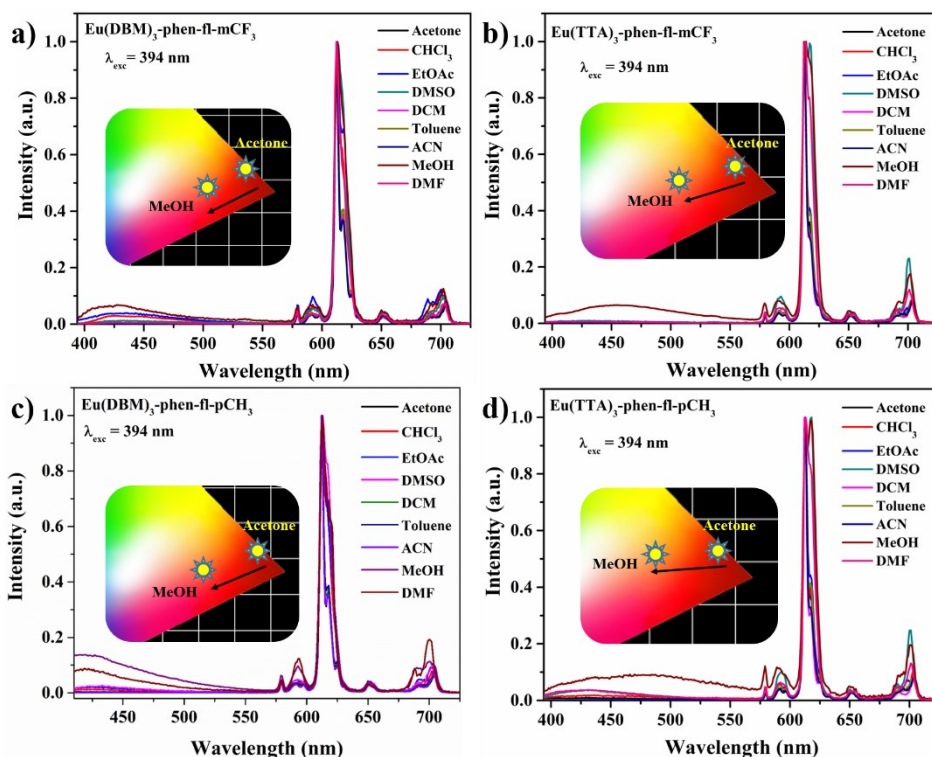

**Fig. S6.** PL of Eu(III) complexes at different solvents (non-polar to polar).

**Table ST1:** CIE Values of Eu(DBM)<sub>3</sub>-phen-fl-mCF<sub>3</sub> and Eu(DBM)<sub>3</sub>-phen-fl-pCH<sub>3</sub> complexes at different solvents (non-polar to polar).

| Solvents          | Eu(DBM) <sub>3</sub> -phen-fl-mCF <sub>3</sub> |        | Eu(DBM) <sub>3</sub> -phen-fl-pCH <sub>3</sub> |        |
|-------------------|------------------------------------------------|--------|------------------------------------------------|--------|
|                   | x                                              | y      | x                                              | y      |
| Acetone           | 0.6508                                         | 0.3266 | 0.6480                                         | 0.3241 |
| CHCl <sub>3</sub> | 0.5737                                         | 0.2893 | 0.6338                                         | 0.3103 |
| EtOAc             | 0.5543                                         | 0.2840 | 0.6061                                         | 0.3081 |
| DMSO              | 0.6256                                         | 0.3190 | 0.6046                                         | 0.2981 |
| DCM               | 0.6569                                         | 0.3260 | 0.6555                                         | 0.3291 |
| Toluene           | 0.6553                                         | 0.3258 | 0.6501                                         | 0.3246 |
| ACN               | 0.6570                                         | 0.3270 | 0.6574                                         | 0.3288 |

|      |        |        |        |        |
|------|--------|--------|--------|--------|
| MeOH | 0.5187 | 0.2778 | 0.4324 | 0.2338 |
| DMF  | 0.6470 | 0.3223 | 0.5036 | 0.2597 |

**Table ST2:** CIE Values of  $\text{Eu}(\text{DBM})_3\text{-phen-fl-mCF}_3$  and  $\text{Eu}(\text{DBM})_3\text{-phen-fl-pCH}_3$  complexes at different solvents (non-polar to polar).

| Solvents        | $\text{Eu}(\text{TTA})_3\text{-phen-fl-mCF}_3$ |        | $\text{Eu}(\text{TTA})_3\text{-phen-fl-pCH}_3$ |        |
|-----------------|------------------------------------------------|--------|------------------------------------------------|--------|
|                 | x                                              | y      | x                                              | y      |
| Acetone         | 0.6224                                         | 0.3209 | 0.6312                                         | 0.3172 |
| $\text{CHCl}_3$ | 0.6567                                         | 0.3252 | 0.5923                                         | 0.3096 |
| EtOAc           | 0.6457                                         | 0.3232 | 0.6508                                         | 0.3255 |
| DMSO            | 0.6366                                         | 0.3192 | 0.5714                                         | 0.2889 |
| DCM             | 0.6590                                         | 0.3288 | 0.6616                                         | 0.3296 |
| Toluene         | 0.6644                                         | 0.3288 | 0.6618                                         | 0.3282 |
| ACN             | 0.6606                                         | 0.3285 | 0.6541                                         | 0.3295 |
| MeOH            | 0.5002                                         | 0.2867 | 0.4482                                         | 0.3095 |
| DMF             | 0.6437                                         | 0.3208 | 0.5728                                         | 0.2853 |

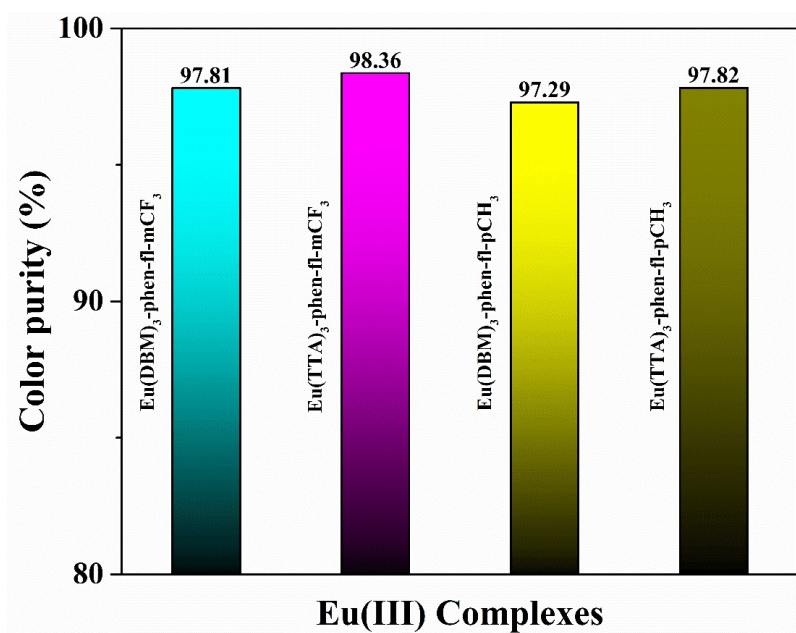

**Fig. S7.** Color purity of the  $\text{Eu}(\text{III})$  complexes.

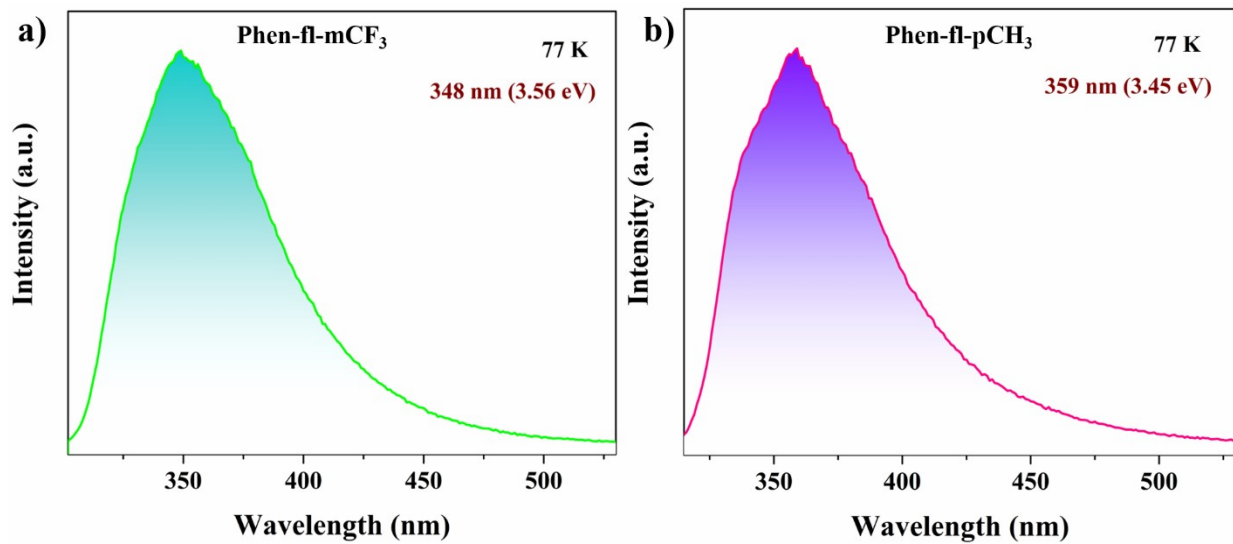

Fig. S8. Phosphorescence emission of the ancillary ligands.

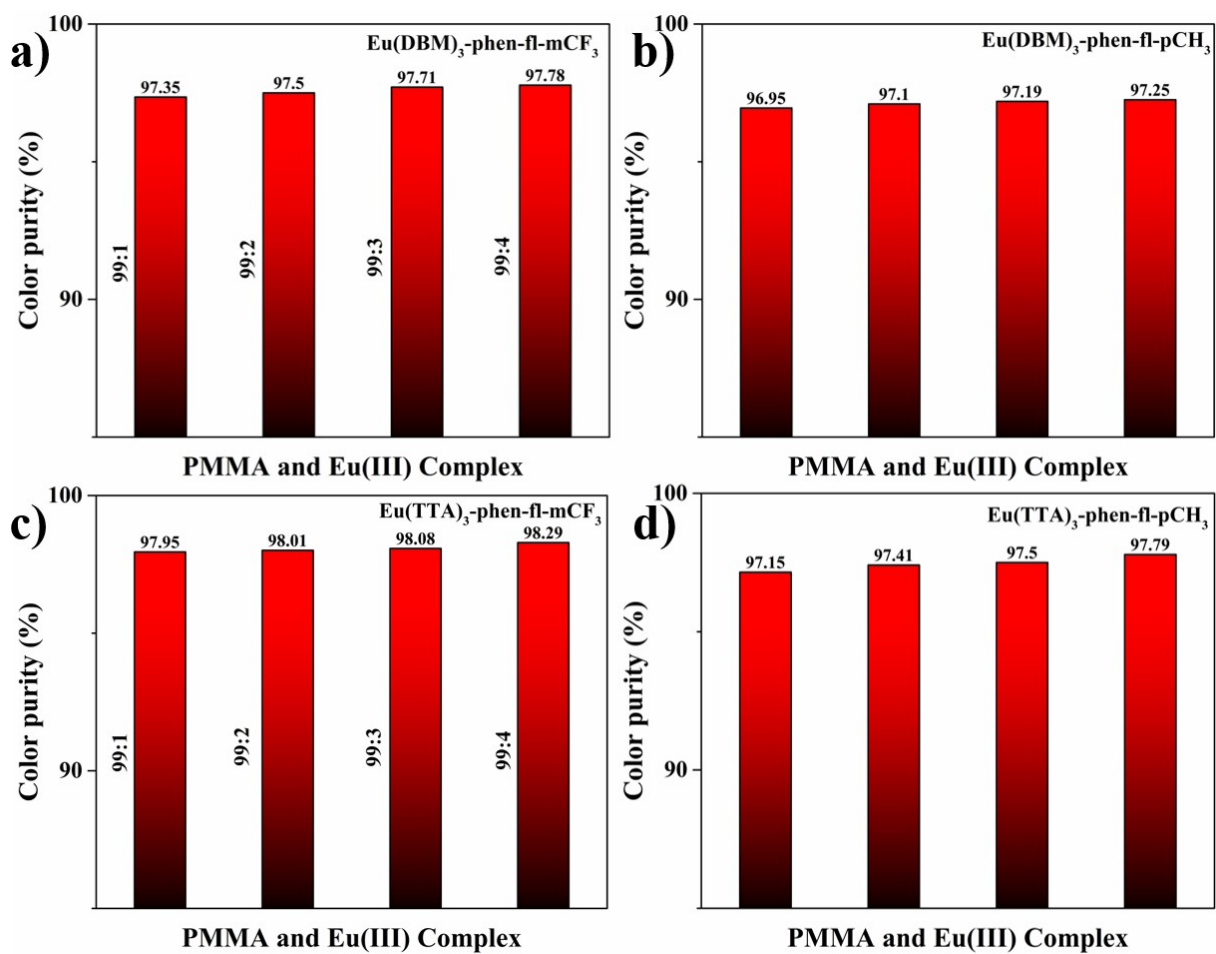

Fig. S9. Color purity of the Eu(III) complexes with PMMA matrix.

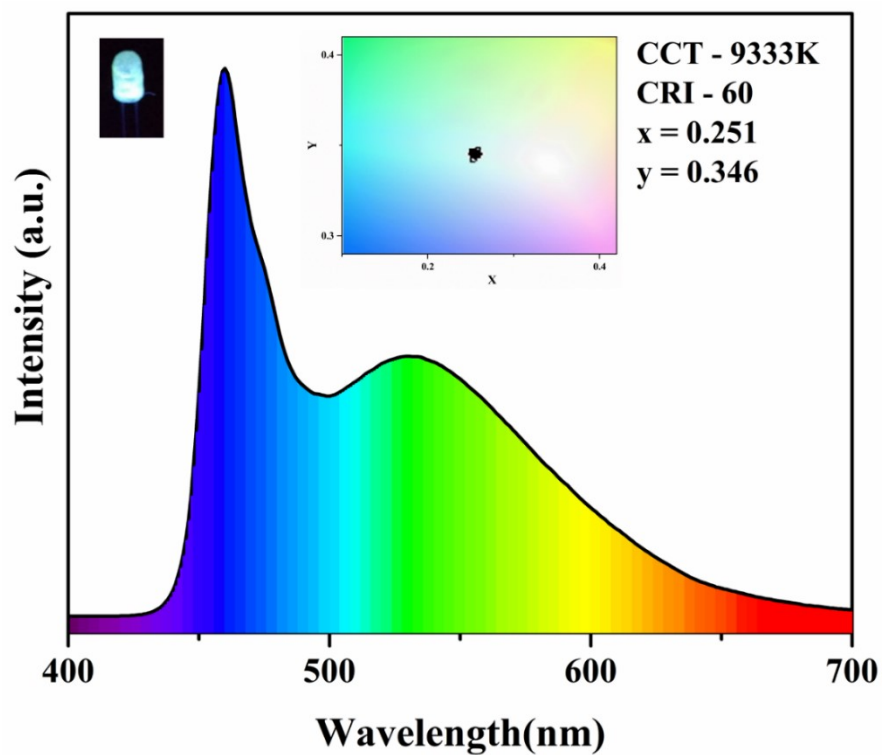

**Fig. S10.** EL spectrum of white LED by using blue LED with yellow organic dye.

**Table ST3.** LER values for the red LEDs.

| Complexes                                      | LER (lm W <sup>-1</sup> ) |      |
|------------------------------------------------|---------------------------|------|
|                                                | 1:10                      | 1:50 |
| Eu(DBM) <sub>3</sub> -phen-fl-mCF <sub>3</sub> | 286                       | 289  |
| Eu(DBM) <sub>3</sub> -phen-fl-pCH <sub>3</sub> | 281                       | 298  |
| Eu(TTA) <sub>3</sub> -phen-fl-mCF <sub>3</sub> | 278                       | 289  |
| Eu(TTA) <sub>3</sub> -phen-fl-pCH <sub>3</sub> | 280                       | 327  |

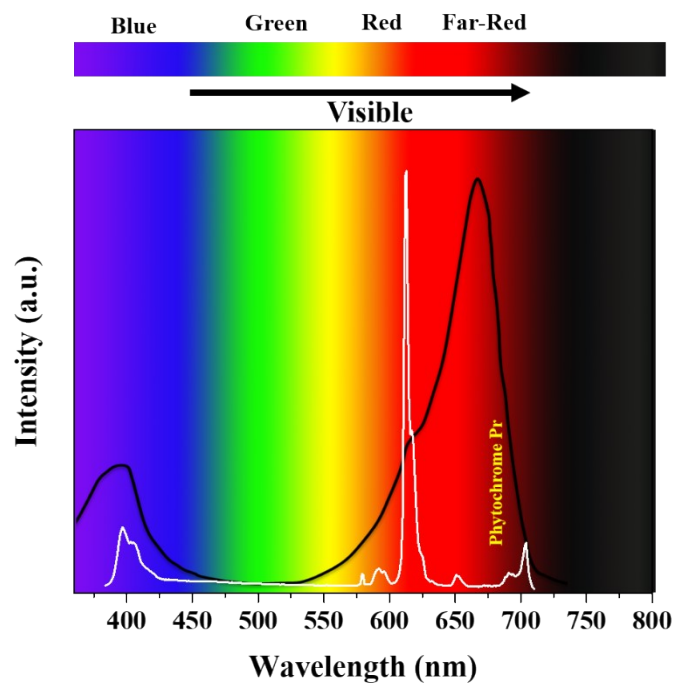

**Fig. S11.** EL spectrum of  $\text{Eu}(\text{TTA})_3\text{-phen-fl-mCF}_3$  red LED merging with Pr absorption lines.

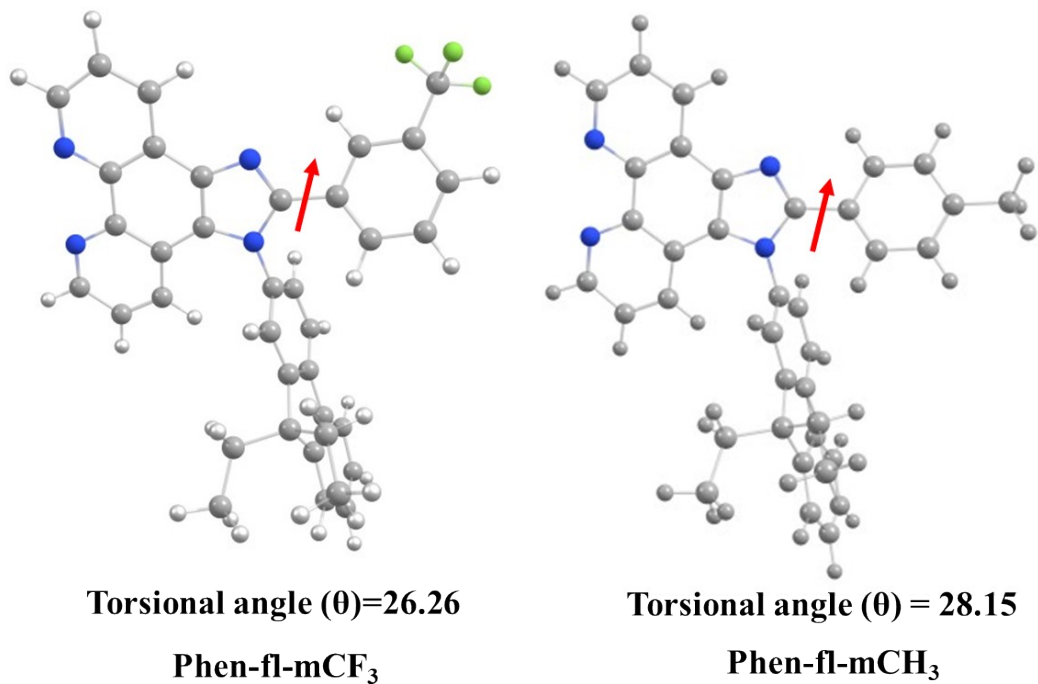

**Fig. S12.** Optimised geometry of the ligands with torsional angle

**Table ST4.** The HOMO-LUMO and HOMO-1, LUMO+1 energy levels of the ancillary ligands.

| Ligands                      | HOMO                                                                               | LUMO                                                                               | HOMO-1                                                                              | LUMO+1                                                                               |
|------------------------------|------------------------------------------------------------------------------------|------------------------------------------------------------------------------------|-------------------------------------------------------------------------------------|--------------------------------------------------------------------------------------|
| Phen-fl-<br>pCH <sub>3</sub> | 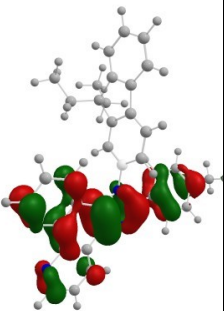  | 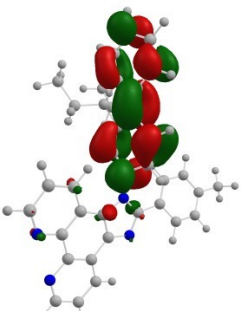  | 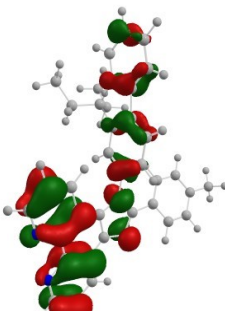  | 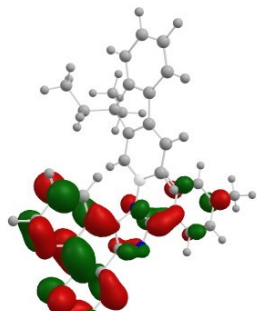  |
| Phen-fl-<br>mCF <sub>3</sub> | 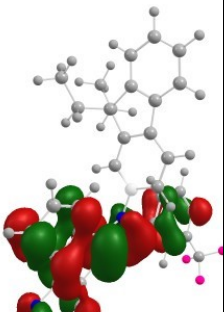 | 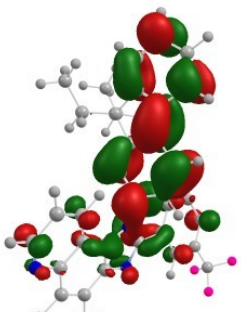 | 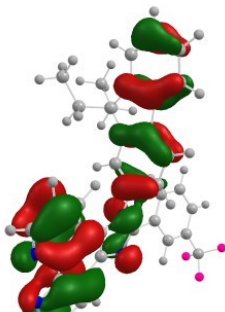 | 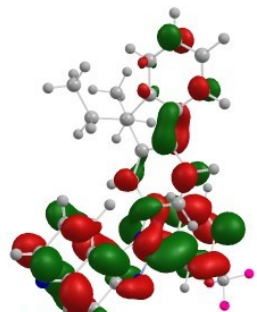 |

**Table ST5.** The computed vertical transitions and their oscillator strengths ( $f$ ) and configuration of the ligands.

| Ligands                                     | State | Energy<br>(eV)              | $\lambda_{\max}$<br>(nm) | $f$    | Configuration                                                                                                           |
|---------------------------------------------|-------|-----------------------------|--------------------------|--------|-------------------------------------------------------------------------------------------------------------------------|
| Phen-fl-<br>pCH <sub>3</sub><br><br>Singlet | Gas   | 3.4619<br>(s <sub>1</sub> ) | 358.14                   | 0.0176 | HOMO→LUMO(34.61%)                                                                                                       |
|                                             |       | 3.6492<br>(s <sub>2</sub> ) | 339.75                   | 0.0702 | HOMO→LUMO+1(58.03%)                                                                                                     |
|                                             |       | 3.8688<br>(s <sub>3</sub> ) | 320.13                   | 0.3265 | HOMO+1→LUMO+1(15.23%)<br>HOMO→LUMO+1(34.14)<br>HOMO→LUMO+2(57.05)%                                                      |
| Triplet                                     | Gas   | 2.7549<br>(T <sub>1</sub> ) | 450.12                   | 0      | HOMO→LUMO (22.49%)<br>HOMO-5→LUMO+3(11.57%)<br>HOMO-1→LUMO (13.64%)<br>HOMO→LUMO+1 (42.62%)<br>HOMO→LUMO+2 (41.24%)     |
|                                             |       | 2.9911<br>(T <sub>2</sub> ) | 414.51                   | 0      | HOMO-9→LUMO +3(11.12%)<br>HOMO-7→LUMO(14.53%)<br>HOMO-2→LUMO (35.32%)<br>HOMO-1→LUMO (35.81%)                           |
|                                             |       | 3.1722<br>(T <sub>3</sub> ) | 390.8                    | 0      | HOMO-7→LUMO+2 (10.25%)<br>HOMO-1→LUMO+2 (10.07%)<br>HOMO→LUMO+1(43.72%)<br>HOMO→LUMO+3 (20.95%)<br>HOMO→LUMO+4 (23.63%) |
|                                             |       | 3.5540<br>(s <sub>1</sub> ) | 348.26                   | 0.069  | HOMO→LUMO (16.21%)                                                                                                      |
|                                             |       |                             |                          |        | HOMO-2→LUMO (12.58%)                                                                                                    |

|         |     |                             |        |        |                                                                                             |
|---------|-----|-----------------------------|--------|--------|---------------------------------------------------------------------------------------------|
| Singlet | DCM | 3.7442<br>(s <sub>2</sub> ) | 315.01 | 0.296  | HOMO→LUMO (13.68%)<br>HOMO→LUMO+1 (66.98%)                                                  |
|         |     | 3.8929<br>(s <sub>3</sub> ) | 299.22 | 0.1471 | HOMO→LUMO+2(67.40%)                                                                         |
| Triplet | DCM | (T <sub>1</sub> )           | 445.80 | 0      | HOMO-6→LUMO +3(11.43%)<br>HOMO-2→LUMO (28.61%)<br>HOMO→LUMO (28.61%)<br>HOMO→LUMO+1(49.35%) |
|         |     | (T <sub>2</sub> )           | 412.70 | 0      | HOMO-4→LUMO +6(10.74%)<br>HOMO-1→LUMO+1(39.63%)<br>HOMO-1→LUMO+1(48.81%)                    |

|                                                 |     |                             |        |        |                                                                                                                          |
|-------------------------------------------------|-----|-----------------------------|--------|--------|--------------------------------------------------------------------------------------------------------------------------|
|                                                 |     | (T <sub>3</sub> )           | 396.78 | 0      | HOMO→LUMO(58.71%)<br>HOMO→LUMO+2(14.58%)<br>HOMO→LUMO+4(16.98%)                                                          |
| phen-<br>fl-<br>mCF <sub>3</sub><br><br>Singlet | Gas | 3.5661<br>(s <sub>1</sub> ) | 347.68 | 0.0046 | HOMO→LUMO (66.66%)                                                                                                       |
|                                                 |     | 3.7230<br>(s <sub>2</sub> ) | 333.02 | 0.1325 | HOMO→HOMO-1 (18.05%)<br>HOMO→LUMO+1 (44.50%)<br>HOMO→LUMO+2 (44.59%)                                                     |
|                                                 |     | 3.8539<br>(s <sub>3</sub> ) | 321.17 | 0.3582 | HOMO→LUMO+3(50.62%)                                                                                                      |
| Triplet                                         | Gas | 2.7417<br>(T <sub>1</sub> ) | 452.25 | 0      | HOMO→LUMO (35.54%)<br>HOMO-1→LUMO+1 (10.40%)<br>HOMO→LUMO+1 (48.42%)<br>HOMO→LUMO+4 (11.50%)                             |
|                                                 |     | 2.9926<br>(T <sub>2</sub> ) | 414.31 | 0      | HOMO-3→LUMO+1 (16.08%)<br>HOMO-2→LUMO (25.41%)<br>HOMO-1→LUMO+1 (36.12%)                                                 |
|                                                 |     | 3.1721<br>(T <sub>3</sub> ) | 390.45 | 0      | HOMO-9→LUMO+2 (13.10%)<br>HOMO-2→LUMO+2 (15.62%)<br>HOMO→LUMO+1 (25.53%)<br>HOMO→LUMO+2 (15.80%)<br>HOMO→LUMO+3 (31.83%) |
| Singlet                                         | DCM | 3.6612<br>(s <sub>1</sub> ) | 339.57 | 0.1584 | HOMO→LUMO (53.69%)<br>HOMO-2→LUMO+1 (42.25%)                                                                             |
|                                                 |     |                             |        |        |                                                                                                                          |

|         |     |                             |        |         |                                                                                                    |
|---------|-----|-----------------------------|--------|---------|----------------------------------------------------------------------------------------------------|
|         |     | 3.7917<br>(s <sub>2</sub> ) | 326.99 | 0.04321 | HOMO-2→LUMO+1 (54.18%)                                                                             |
|         |     | 3.9811<br>(s <sub>3</sub> ) | 311.51 | 0.0740  | HOMO-2→LUMO+2 (69.11%)                                                                             |
| Triplet | DCM | 2.7832<br>(T <sub>1</sub> ) | 448.48 | 0       | HOMO-2→LUMO (13.97%)<br>HOMO-2→LUMO+1(10.48%)<br>HOMO→LUMO (55.12%)<br>HOMO→LUMO+3 (13.41%)        |
|         |     | 3.0060<br>(T <sub>2</sub> ) | 412.31 | 0       | HOMO-4→LUMO+7 (14.38%)<br>HOMO-1→LUMO (10.84%)<br>HOMO-1→LUMO +2(55.30%)<br>HOMO-1→LUMO+4 (11.31%) |
|         |     | 3.1690<br>(T <sub>3</sub> ) | 391.24 | 0       | HOMO-7→LUMO (10.91%)<br>HOMO-2→LUMO (15.80%)<br>HOMO-2→LUMO +1(20.81%)<br>HOMO→LUMO+3 (40.69%)     |

xyz coordinates

**Phen-fl-mCF<sub>3</sub>:**

|   |           |          |           |
|---|-----------|----------|-----------|
| 6 | -0.825954 | 4.562481 | -1.073686 |
| 6 | -0.437852 | 3.255351 | -0.853155 |
| 6 | 0.887416  | 2.979264 | -0.450585 |
| 6 | 1.778929  | 4.095186 | -0.311508 |
| 6 | 0.119417  | 5.583877 | -0.888722 |
| 6 | 1.435560  | 1.676628 | -0.184731 |

|   |           |           |           |
|---|-----------|-----------|-----------|
| 6 | 3.188320  | 3.894593  | 0.061880  |
| 6 | 3.684494  | 2.581826  | 0.276326  |
| 6 | 2.774289  | 1.482063  | 0.139459  |
| 6 | 5.040206  | 2.418555  | 0.616820  |
| 1 | 5.425780  | 1.417890  | 0.782188  |
| 6 | 5.835029  | 3.541371  | 0.732116  |
| 6 | 5.250063  | 4.802063  | 0.504197  |
| 1 | -1.838192 | 4.798762  | -1.386456 |
| 1 | -1.145221 | 2.449317  | -0.995215 |
| 1 | -0.159739 | 6.624476  | -1.048833 |
| 1 | 6.885860  | 3.465378  | 0.993299  |
| 1 | 5.855395  | 5.703510  | 0.591797  |
| 7 | 3.978357  | 4.984241  | 0.180783  |
| 7 | 1.373833  | 5.363317  | -0.526754 |
| 7 | 3.056327  | 0.154047  | 0.302770  |
| 7 | 0.881003  | 0.395937  | -0.203750 |
| 6 | -0.476430 | 0.061020  | -0.527209 |
| 6 | -1.474332 | 0.215170  | 0.446876  |
| 6 | -0.784830 | -0.410865 | -1.807054 |
| 6 | -2.785569 | -0.109915 | 0.122320  |
| 1 | -1.201141 | 0.587060  | 1.429877  |
| 6 | -2.101306 | -0.740750 | -2.130986 |
| 1 | 0.009531  | -0.515469 | -2.538485 |

|   |           |           |           |
|---|-----------|-----------|-----------|
| 6 | -4.036821 | -0.028130 | 1.006111  |
| 6 | -3.098492 | -0.588456 | -1.165365 |
| 1 | -2.337977 | -1.107810 | -3.125077 |
| 6 | -5.110308 | -0.521300 | 0.026325  |
| 6 | -4.539502 | -0.847594 | -1.223595 |
| 6 | -6.481929 | -0.693921 | 0.211499  |
| 6 | -5.319506 | -1.336013 | -2.272935 |
| 6 | -7.265041 | -1.184004 | -0.840304 |
| 1 | -6.954754 | -0.450176 | 1.155636  |
| 6 | -6.690080 | -1.502690 | -2.073392 |
| 1 | -4.869990 | -1.584062 | -3.230334 |
| 1 | -8.332864 | -1.316803 | -0.693770 |
| 1 | -7.312224 | -1.881387 | -2.878735 |
| 6 | -4.216553 | 1.461914  | 1.452243  |
| 6 | -5.589824 | 1.933360  | 1.946818  |
| 1 | -3.940210 | 2.093409  | 0.599937  |
| 1 | -3.464128 | 1.660875  | 2.226546  |
| 1 | -5.522898 | 2.984067  | 2.247671  |
| 1 | -6.342347 | 1.867817  | 1.156957  |
| 1 | -5.954957 | 1.370768  | 2.808890  |
| 6 | -3.815905 | -1.014784 | 2.199699  |
| 6 | -4.922073 | -1.184000 | 3.246433  |
| 1 | -2.900102 | -0.697262 | 2.714516  |

|   |           |           |           |
|---|-----------|-----------|-----------|
| 1 | -3.593539 | -1.997405 | 1.766154  |
| 1 | -4.624745 | -1.956196 | 3.963583  |
| 1 | -5.100818 | -0.268584 | 3.815768  |
| 1 | -5.867483 | -1.504236 | 2.800897  |
| 6 | 1.919008  | -0.486514 | 0.096476  |
| 6 | 1.830213  | -1.955855 | 0.170286  |
| 6 | 0.660833  | -2.674683 | 0.467692  |
| 6 | 3.023495  | -2.671641 | -0.035532 |
| 6 | 0.684661  | -4.067742 | 0.538376  |
| 1 | -0.268715 | -2.155603 | 0.659851  |
| 6 | 3.038326  | -4.060371 | 0.039985  |
| 1 | 3.930378  | -2.122021 | -0.253741 |
| 6 | 1.866433  | -4.770071 | 0.322485  |
| 1 | -0.229626 | -4.606076 | 0.767942  |
| 1 | 1.884345  | -5.853431 | 0.367234  |
| 6 | 4.334813  | -4.806779 | -0.130708 |
| 9 | 4.929245  | -5.051729 | 1.060670  |
| 9 | 5.222878  | -4.120370 | -0.880949 |
| 9 | 4.144383  | -6.008063 | -0.724075 |

**Phen-fl-p-CH<sub>3</sub>:**

|   |           |           |           |
|---|-----------|-----------|-----------|
| 6 | -1.325533 | -4.000149 | -0.984558 |
| 6 | -1.169156 | -2.639718 | -0.804477 |

|   |           |           |           |
|---|-----------|-----------|-----------|
| 6 | -2.279779 | -1.852578 | -0.427400 |
| 6 | -3.538626 | -2.524507 | -0.271421 |
| 6 | -2.596758 | -4.562279 | -0.786018 |
| 6 | -2.271603 | -0.432404 | -0.204918 |
| 6 | -4.755439 | -1.775012 | 0.077625  |
| 6 | -4.694394 | -0.366783 | 0.250662  |
| 6 | -3.425811 | 0.282941  | 0.094527  |
| 6 | -5.876877 | 0.326308  | 0.570814  |
| 1 | -5.836181 | 1.402333  | 0.704655  |
| 6 | -7.049716 | -0.388812 | 0.706827  |
| 6 | -7.008637 | -1.784087 | 0.518822  |
| 1 | -0.486693 | -4.624180 | -1.276737 |
| 1 | -0.201703 | -2.180998 | -0.958596 |
| 1 | -2.748662 | -5.633237 | -0.914650 |
| 1 | -7.985860 | 0.102181  | 0.953836  |
| 1 | -7.920383 | -2.371337 | 0.622745  |
| 7 | -5.911463 | -2.461488 | 0.215542  |
| 7 | -3.664264 | -3.855811 | -0.447825 |
| 7 | -3.164691 | 1.620443  | 0.214522  |
| 7 | -1.258753 | 0.527649  | -0.254507 |
| 6 | 0.121383  | 0.290705  | -0.564946 |
| 6 | 0.973327  | -0.215526 | 0.427988  |
| 6 | 0.597156  | 0.563012  | -1.851406 |

|   |           |           |           |
|---|-----------|-----------|-----------|
| 6 | 2.306959  | -0.447483 | 0.115244  |
| 1 | 0.571457  | -0.415275 | 1.416748  |
| 6 | 1.937142  | 0.332131  | -2.164400 |
| 1 | -0.087673 | 0.954086  | -2.596279 |
| 6 | 3.420924  | -0.986192 | 1.022377  |
| 6 | 2.788303  | -0.174702 | -1.180146 |
| 1 | 2.303828  | 0.545005  | -3.164090 |
| 6 | 4.604970  | -0.993915 | 0.045698  |
| 6 | 4.213837  | -0.511234 | -1.222787 |
| 6 | 5.931686  | -1.373990 | 0.247391  |
| 6 | 5.126379  | -0.410750 | -2.274001 |
| 6 | 6.847899  | -1.272661 | -0.806301 |
| 1 | 6.266181  | -1.753395 | 1.205901  |
| 6 | 6.449806  | -0.795528 | -2.057765 |
| 1 | 4.814471  | -0.038788 | -3.245885 |
| 1 | 7.880022  | -1.570496 | -0.646823 |
| 1 | 7.172970  | -0.724212 | -2.864697 |
| 6 | 2.996044  | -2.408916 | 1.517584  |
| 6 | 4.068581  | -3.361830 | 2.060526  |
| 1 | 2.503286  | -2.912932 | 0.678086  |
| 1 | 2.217524  | -2.268200 | 2.278735  |
| 1 | 3.591779  | -4.290219 | 2.391831  |
| 1 | 4.795243  | -3.626036 | 1.288182  |

|   |           |           |           |
|---|-----------|-----------|-----------|
| 1 | 4.615503  | -2.954090 | 2.913463  |
| 6 | 3.604131  | 0.050996  | 2.178653  |
| 6 | 4.686360  | -0.186541 | 3.237302  |
| 1 | 2.636279  | 0.138538  | 2.688611  |
| 1 | 3.786036  | 1.024868  | 1.708215  |
| 1 | 4.715265  | 0.668628  | 3.920671  |
| 1 | 4.490447  | -1.074814 | 3.843056  |
| 1 | 5.682428  | -0.281360 | 2.797011  |
| 6 | -1.866632 | 1.757839  | 0.004318  |
| 6 | -1.203400 | 3.072794  | 0.026068  |
| 6 | 0.147026  | 3.283882  | 0.345415  |
| 6 | -2.001968 | 4.199767  | -0.247216 |
| 6 | 0.675816  | 4.573666  | 0.372316  |
| 1 | 0.790764  | 2.450746  | 0.595813  |
| 6 | -1.464200 | 5.479637  | -0.216513 |
| 1 | -3.050748 | 4.046607  | -0.474587 |
| 6 | -0.111281 | 5.694078  | 0.087133  |
| 1 | 1.723218  | 4.708959  | 0.629945  |
| 1 | -2.105113 | 6.330742  | -0.433493 |
| 6 | 0.472749  | 7.085802  | 0.089120  |
| 1 | 1.423199  | 7.120843  | 0.628903  |
| 1 | 0.662026  | 7.437853  | -0.932683 |
| 1 | -0.208716 | 7.804849  | 0.555159  |
